# Supplementary material for: A single chain magnet based on a 1D polymeric selenite-bridged Mn(iii) complex with an N2O2 donor
Source: Royal Society of Chemistry journal article supplement (doi:10.1039/d2nj04040a), 2022-01-01
Supplement: d2nj04040a1.pdf [file d2nj04040a1.pdf]

Electronic Supplementary Material (ESI)

This journal is © The Royal Society of Chemistry 2022

**Single chain magnet based on 1D polymeric selenite-bridged Mn(III) complex  
with a N<sub>2</sub>O<sub>2</sub> donor**

Shao-Liang Zhang<sup>\*a</sup>, Cai-Ran Yue<sup>a</sup>, Yi-Nuo Dong<sup>a</sup>, Xiao-Na Liu<sup>a</sup>, Yan-Lan Wang<sup>\*a</sup>, Shan-Shan Li<sup>\*b</sup>

*<sup>a</sup>Institution of Functional Organic Molecules and Materials, School of Chemistry and Chemical Engineering, Liaocheng University, Liaocheng, 252059, China*

*<sup>b</sup>School of Geography and Environment, Liaocheng University, Liaocheng, 252059, China*

E-mail: [zhangshaoliang05@163.com](mailto:zhangshaoliang05@163.com), [wangyanlan@lcu.edu.cn](mailto:wangyanlan@lcu.edu.cn), [lishanshan@lcu.edu.cn](mailto:lishanshan@lcu.edu.cn)

Supporting Information

**Table S1.** Selected bond lengths [Å] and angles [°] for complex **1**.

| Complex 1         |           |                   |           |
|-------------------|-----------|-------------------|-----------|
| Mn(1)-O(3)        | 1.864(9)  | Mn(2)-O(6)        | 1.856(9)  |
| Mn(1)-O(4)        | 1.827(9)  | Mn(2)-O(5)        | 1.825(10) |
| Mn(1)-N(1)        | 1.916(12) | Mn(2)-N(4)        | 1.900(13) |
| Mn(1)-N(2)        | 1.925(12) | Mn(2)-N(3)        | 1.948(12) |
| Mn(1)-O(1)        | 2.060(8)  | Mn(2)-O(2)        | 2.051(10) |
| Mn(1)-O(3)#1      | 2.470(8)  | Mn(2)-O(6)#2      |           |
| Se(1)-O(1)        | 1.675(8)  | Se(1)-O(2)        | 1.622(9)  |
| O(3)-Mn(1)-O(4)   | 95.5(4)   | O(6)-Mn(2)-O(5)   | 92.8(4)   |
| O(3)-Mn(1)-N(1)   | 89.6(4)   | O(6)-Mn(2)-N(4)   | 92.0(4)   |
| O(4)-Mn(1)-N(1)   | 172.9(5)  | O(5)-Mn(2)-N(4)   | 166.6(5)  |
| O(3)-Mn(1)-N(2)   | 167.3(4)  | O(6)-Mn(2)-N(3)   | 163.9(4)  |
| O(4)-Mn(1)-N(2)   | 91.3(5)   | O(5)-Mn(2)-N(3)   | 90.4(5)   |
| N(1)-Mn(1)-N(2)   | 82.8(5)   | N(4)-Mn(2)-N(3)   | 81.7(5)   |
| O(3)-Mn(1)-O(1)   | 92.8(4)   | O(6)-Mn(2)-O(2)   | 97.4(4)   |
| O(4)-Mn(1)-O(1)   | 96.5(4)   | O(5)-Mn(2)-O(2)   | 96.7(4)   |
| N(1)-Mn(1)-O(1)   | 88.2(4)   | N(4)-Mn(2)-O(2)   | 95.1(4)   |
| N(2)-Mn(1)-O(1)   | 97.2(4)   | N(3)-Mn(2)-O(2)   | 97.9(4)   |
| O(1)-Mn(1)-O(3)#1 | 171.9(3)  | O(2)-Mn(2)-O(6)#2 | 97.4(4)   |

Symmetry code for complex **1**: -x+1, -y+2, -z+1;

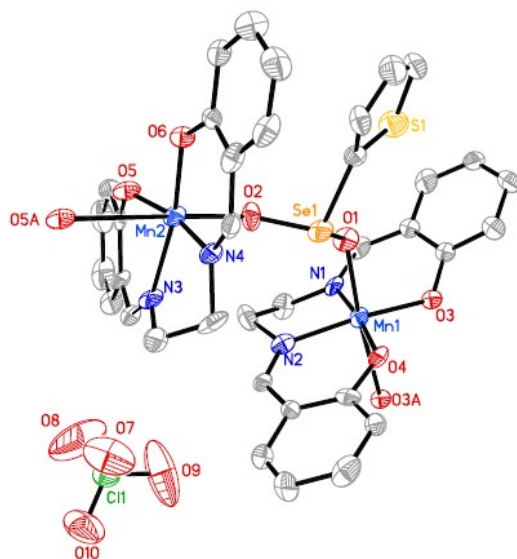

**Figure S1.** The asymmetric unit of complex **1**, rendered with 30% probability ellipsoids. Hydrogen atoms are omitted for clarity.

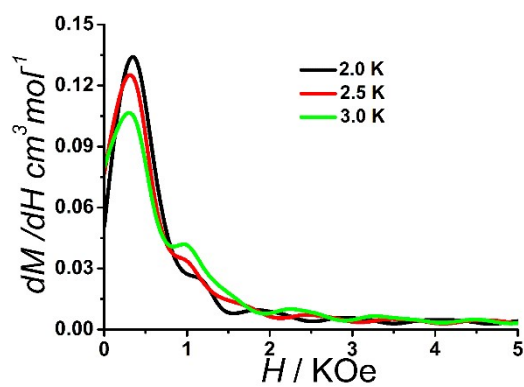

**Figure S2.** The derivative of field-dependent magnetization of **1** measured at different temperatures.

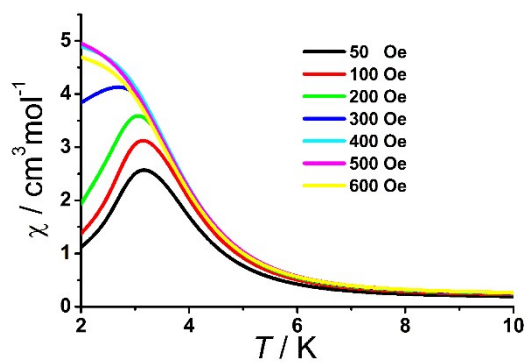

**Figure S3** The  $\chi_M$  versus  $T$  plots measured at different external fields of **1**.

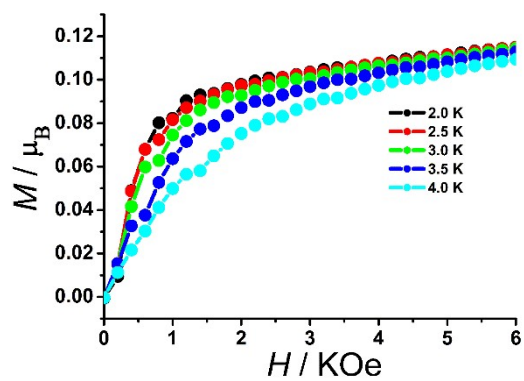

**Figure S4** The  $M$  versus  $H$  plots measured at different temperature of complex **1**.

This structure is based on extremely weak data; the minimum required resolution of  $50^\circ$  in  $2\theta$  has not meaningfully been reached. Only data up to around  $40^\circ$  contain information, the rest is noise.

Please recollect new data on this material, making sure to reach  $50^\circ$  resolution.

If you can not do this, please add the attached images to your SI, and provide a credible reason as to why it was impossible to obtain data to the minimum required resolution. Your answer must contain the exposure time and scan width of the frames.

Thank you.

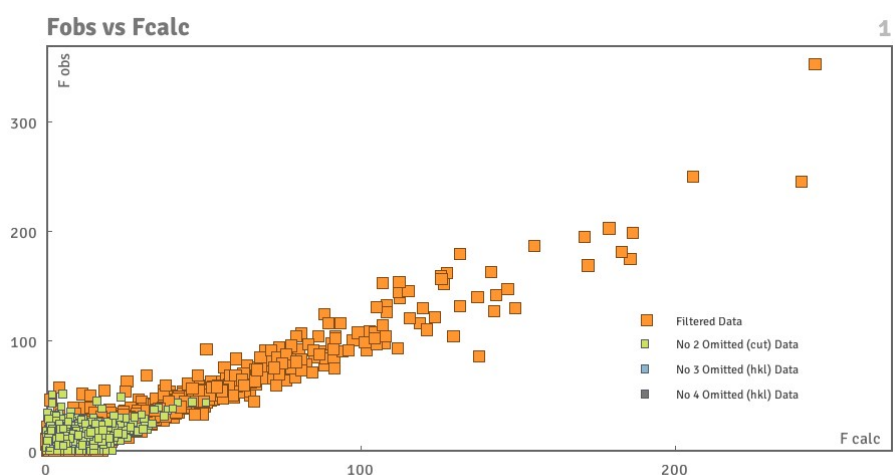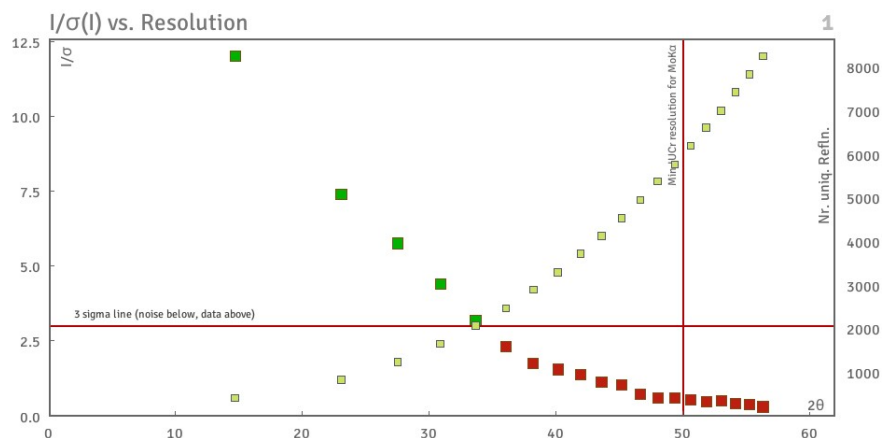

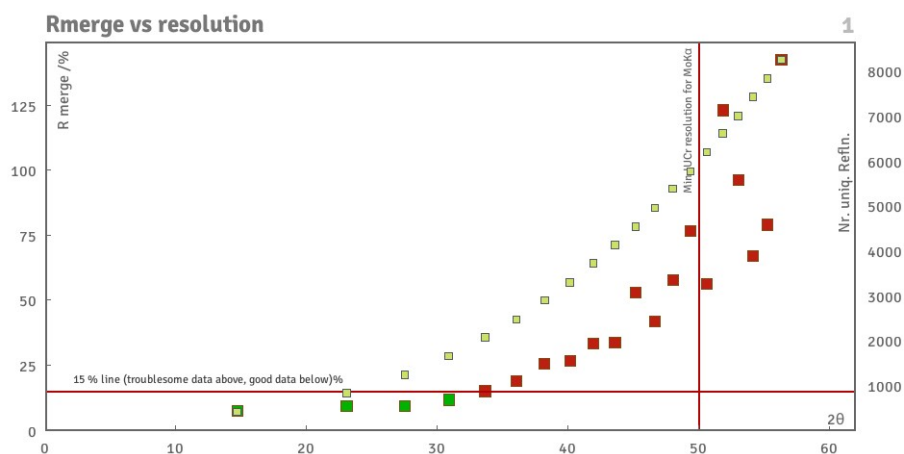

Response:

We appreciate your valuable comments. Yes, the data of the structure in this paper is indeed not strong. We realized that in the very beginning. The crystal grows so small and thin, that its diffraction was very weak. To improve the data, we have tried many times to cultivate bigger crystal in size in different solvents, but failed. Then, we tried to set longer exposure time. The frustration is that even when we set exposure time as 100s, its diffraction was still very weak. It looks like the weakness came from crystal itself, and it was impossible to obtain data to the minimum required resolution.

The exposure time per frame was 100s, and the scan width was  $0.9^\circ$  in this study.
